# Supplementary material for: Semantic relatedness retroactively boosts memory and promotes memory interdependence across episodes
Source: eLife. 2022 Jun 15;11:e72519. doi: 10.7554/eLife.72519 (PMC9203053; doi:10.7554/eLife.72519)
Supplement: Supplementary file 1. — AS: associative strength; MS: mediator strength; Spath: weighted shortest path; SpAct: spreading activation strength; GloVe: global vector cos(θ); w2v: word2vec cos(θ); LSA: latent semantic analysis cos(θ). Bold: relatedness factor of interest. Related to Figure 1. [file elife-72519-supp1.xlsx]

## Sheet: S1stimset1
Word #	Cue	ΔCue	Cue←ΔCue AS	Cue→ΔCue AS	Cue←ΔCue MS	Cue←ΔCue Spath	Cue←ΔCue SpAct	Cue/ΔCue GloVe	Cue/ΔCue w2v	Cue/ΔCue LSA
1	holy	pious	0.028	0	0.0011	0.972	0.0290947	0.564466	0.442162	0.37
2	soup	broth	0.806	0.036	0.022	0.194	0.848786	0.743002	0.651077	0.53
3	agent	spy	0.066	0.021	0.0032	0.934	0.0693205	0.298467	0.222399	0.16
4	fork	spoon	0.614	0.441	0.0232	0.386	0.693587	0.603204	0.451161	0.48
5	run	jog	0.783	0.14	0.0309	0.217	0.965676	0.371616	0.268781	0.39
6	copy	mimic	0.294	0	0.0288	0.706	0.333245	0.155759	0.0802217	0.05
7	brick	block	0.1	0.051	0.007	0.9	0.106955	0.48477	0.276773	0.55
8	shelf	rack	0.111	0	0	0.889	0.111113	0.61467	0.404101	0.37
9	crazy	wild	0.127	0.068	0.0008	0.873	0.129893	0.54973	0.471568	0.19
10	cow	moo	0.96	0.061	0	0.04	1.30055	0.509337	0.32774	0.7
11	faint	dizzy	0.141	0.055	0	0.859	0.141832	0.446702	0.390838	0.33
12	peace	truce	0.351	0	0.0232	0.649	0.389492	0.563355	0.55566	0.46
13	shy	timid	0.689	0.104	0.0006	0.311	0.738534	0.698961	0.439689	0.45
14	clean	wash	0.223	0	0.0346	0.777	0.268618	0.634771	0.450317	0.63
15	bear	cub	0.585	0.051	0.001	0.415	0.616195	0.474533	0.402196	0.74
16	cold	chill	0.732	0	0.067	0.268	0.997101	0.660652	0.632401	0.51
17	death	widow	0.209	0	0.0016	0.791	0.218047	0.531338	0.425222	0.26
18	fad	trend	0.214	0.129	0.0047	0.786	0.218952	0.520945	0.520797	0.07
19	bike	pedal	0.544	0.047	0	0.456	0.546299	0.496553	0.46665	0.5
20	meat	veal	0.252	0	0.006	0.748	0.263058	0.628793	0.665444	0.58
21	judge	gavel	0.467	0.041	0.022	0.533	0.513027	0.306385	0.184076	0.16
22	mud	dirt	0.276	0.599	0.002	0.724	0.27894	0.70214	0.580571	0.5
23	knife	sword	0.301	0.051	0.0729	0.699	0.394034	0.611042	0.557602	0.23
24	hurry	rush	0.317	0.289	0.001	0.683	0.318083	0.635586	0.515095	0.44
25	yell	scold	0.32	0	0.0245	0.68	0.38606	0.556114	0.434875	0.16
26	pop	soda	0.439	0.432	0	0.561	0.443377	0.328366	0.218252	0.33
27	city	town	0.529	0.307	0.0089	0.471	0.565257	0.771146	0.672374	0.27
28	snake	cobra	0.831	0	0.009	0.169	0.938576	0.535862	0.648841	0.44
29	hair	lice	0.372	0.011	0.0192	0.628	0.416664	0.353491	0.340631	0.26
30	groom	bride	0.865	0.62	0	0.135	0.865	0.765713	0.675821	0.74
31	horse	pony	0.752	0.109	0.0362	0.248	0.917676	0.737149	0.561182	0.79
32	shoes	socks	0.655	0.307	0.0309	0.345	0.711876	0.650075	0.657437	0.67
33	scare	spook	0.446	0	0.0127	0.554	0.536769	0.543003	0.450688	0.13
34	alone	solo	0.455	0.04	0.0161	0.545	0.486242	0.284775	0.172423	0.24
35	pig	hog	0.741	0.2	0.007	0.259	0.830132	0.707255	0.628964	0.45
36	ocean	waves	0.496	0	0.0469	0.504	0.584998	0.620677	0.379745	0.22
37	couch	sofa	0.507	0.189	0.0178	0.493	0.53483	0.825618	0.830918	0.71
38	brush	comb	0.636	0.163	0.065	0.364	0.779504	0.591622	0.386495	0.29
39	floor	tile	0.578	0.17	0.0046	0.422	0.614749	0.600074	0.336981	0.37
40	bet	wager	0.606	0.073	0.0019	0.394	0.628192	0.759915	0.770571	0.05
41	test	exam	0.778	0.252	0.001	0.222	0.912356	0.59552	0.506585	0.42
42	cry	weep	0.917	0.058	0.0025	0.083	1.1204	0.675228	0.574816	0.54
43	beach	sand	0.717	0.394	0.0028	0.283	0.745984	0.638894	0.520518	0.73
44	sick	ill	0.824	0.355	0.0222	0.176	0.953391	0.774074	0.651342	0.63
45	beer	keg	0.885	0	0.0074	0.115	0.965681	0.657794	0.61092	0.16
Word #	Target	ΔTarget	Target←ΔTarget AS	Target→ΔTarget AS	Target←ΔTarget MS	Target←ΔTarget Spath	Target←ΔTarget SpAct	Target/ΔTarget GloVe	Target/ΔTarget w2v	Target/ΔTarget LSA
1	fish	trout	0.913	0.036	0.0011	0.972	0.0290947	0.732825	0.778065	0.85
2	take	usurp	0.05	0	0.022	0.194	0.848786	0.213633	0.353887	0.11
3	music	flute	0.289	0.014	0.0032	0.934	0.0693205	0.480014	0.463918	0.58
4	ask	favor	0.075	0	0.0232	0.386	0.693587	0.389161	0.151973	0.17
5	star	space	0.086	0.019	0.0309	0.217	0.965676	0.247295	0.0591129	0.27
6	angel	saint	0.091	0.041	0.0288	0.706	0.333245	0.432691	0.388486	0.28
7	tear	rip	0.711	0.31	0.007	0.9	0.106955	0.534632	0.546338	0.26
8	smart	wit	0.236	0	0	0.889	0.111113	0.385251	0.257108	0.18
9	drain	clog	0.331	0.083	0.0008	0.873	0.129893	0.397389	0.361528	0.32
10	cabin	lodge	0.138	0	0	0.04	1.30055	0.578145	0.443481	0.38
11	rules	laws	0.395	0	0	0.859	0.141832	0.713462	0.638801	0.5
12	razor	shave	0.151	0.172	0.0232	0.649	0.389492	0.639947	0.443106	0.3
13	hot	steam	0.166	0.02	0.0006	0.311	0.738534	0.40913	0.292852	0.35
14	lie	cheat	0.176	0.121	0.0346	0.777	0.268618	0.347948	0.403986	0.15
15	swing	sway	0.185	0.041	0.001	0.415	0.616195	0.472134	0.346132	0.23
16	float	drift	0.196	0	0.067	0.268	0.997101	0.441108	0.357081	0.32
17	work	chore	0.408	0	0.0016	0.791	0.218047	0.317514	0.280234	0.22
18	stone	rock	0.269	0.629	0.0047	0.786	0.218952	0.504879	0.375102	0.15
19	weak	frail	0.245	0.021	0	0.456	0.546299	0.465037	0.378897	0.3
20	story	fable	0.481	0.014	0.006	0.748	0.263058	0.475629	0.562676	0.57
21	dress	hem	0.261	0	0.022	0.533	0.513027	0.418799	0.483274	0.59
22	sun	rays	0.624	0.016	0.002	0.724	0.27894	0.678247	0.601547	0.41
23	light	lamp	0.769	0.02	0.0729	0.699	0.394034	0.666809	0.336959	0.61
24	bee	hive	0.809	0.173	0.001	0.683	0.318083	0.62003	0.446228	0.92
25	egg	yolk	0.839	0.079	0.0245	0.68	0.38606	0.737376	0.546736	0.89
26	funny	clown	0.325	0.027	0	0.561	0.443377	0.494717	0.426635	0.5
27	green	slime	0.341	0	0.0089	0.471	0.565257	0.317251	0.209105	0.35
28	gross	yuck	0.364	0.043	0.009	0.169	0.938576	0.404841	0.223575	0.04
29	pain	agony	0.649	0.032	0.0192	0.628	0.416664	0.657134	0.604262	0.36
30	blood	vein	0.384	0.045	0	0.135	0.865	0.47439	0.164454	0.76
31	smoke	pipe	0.419	0.016	0.0362	0.248	0.917676	0.449546	0.277864	0.34
32	lime	lemon	0.429	0.573	0.0309	0.345	0.711876	0.778827	0.582821	0.33
33	stop	halt	0.906	0.05	0.0127	0.554	0.536769	0.542154	0.608264	0.46
34	want	need	0.599	0.289	0.0161	0.545	0.486242	0.864101	0.688381	0.4
35	fix	mend	0.476	0.041	0.007	0.259	0.830132	0.496951	0.480011	0.4
36	gas	fuel	0.664	0.154	0.0469	0.504	0.584998	0.761103	0.563876	0.36
37	chew	gum	0.563	0.361	0.0178	0.493	0.53483	0.565982	0.373996	0.55
38	fire	flame	0.511	0.048	0.065	0.364	0.779504	0.642718	0.431481	0.64
39	tree	oak	0.795	0.041	0.0046	0.422	0.614749	0.509527	0.469332	0.8
40	teeth	gums	0.705	0.083	0.0019	0.394	0.628192	0.682914	0.504861	0.92
41	loud	noisy	0.671	0	0.001	0.222	0.912356	0.743839	0.662127	0.64
42	boat	oar	0.695	0	0.0025	0.083	1.1204	0.446154	0.515705	0.8
43	jeans	denim	0.815	0.047	0.0028	0.283	0.745984	0.860654	0.731907	0.18
44	push	shove	0.936	0.418	0.0222	0.176	0.953391	0.605735	0.507347	0.33
45	late	tardy	0.899	0.088	0.0074	0.115	0.965681	0.326878	0.278957	0.22
