# Supplementary material for: Semantic relatedness retroactively boosts memory and promotes memory interdependence across episodes
Source: eLife. 2022 Jun 15;11:e72519. doi: 10.7554/eLife.72519 (PMC9203053; doi:10.7554/eLife.72519)
Supplement: Supplementary file 2. — AS: associative strength; MS: mediator strength; Spath: weighted shortest path; SpAct: spreading activation strength; GloVe: global vector cos(θ); w2v: word2vec cos(θ); LSA: latent semantic analysis cos(θ). Bold: relatedness factor of interest. Note that AS and MS values of 0 reflect the absence of a one- or two-step semantic association, respectively. Related to Figure 1. [file elife-72519-supp2.xlsx]

## Sheet: S2stimset2
Word #	Cue	ΔCue	Cue←ΔCue AS	Cue→ΔCue AS	Cue←ΔCue MS	Cue←ΔCue Spath	Cue←ΔCue SpAct	Cue/ΔCue GloVe	Cue/ΔCue w2v	Cue/ΔCue LSA
1	plaza	mold	0	0	0	5.732	0	0.207524	0.0395088	0.01
2	croak	top	0	0	0	3.761	0	-0.12541	0.0151681	0.06
3	act	evens	0	0	0	6	0	-0.112204	0.0256902	0
4	baker	cook	0	0.122	0	3.888	0	0.676052	0.519146	0.24
5	pious	add	0	0	0	4.758	0	-0.0560232	-0.0196206	0.1
6	bike	paint	0	0	0	3.526	0	0.410239	0.158116	0.07
7	town	god	0	0	0	3.755	0	0.282753	0.11456	0.11
8	acorn	minus	0	0	0	4.819	0	-0.0501719	0.0353884	0.04
9	tired	bored	0.386	0.034	0.013	0.614	0.421875	0.739207	0.6456	0.38
10	bugle	idea	0	0	0	4.748	0	-0.0263085	0.0971198	0.06
11	vivid	sit	0	0	0	3.938	0	0.0927609	-0.00948109	0.09
12	wart	news	0	0	0	3.924	0	-0.0146707	0.0180655	0.04
13	mimic	check	0	0	0	4.81	0	0.0110013	0.121456	0.02
14	seize	bee	0	0	0	4.684	0	0.056006	-0.112861	0
15	pack	full	0	0	0	2.946	6.3882e-08	0.528742	0.108963	0.31
16	inch	cover	0	0	0	3.599	0	0.502682	0.160418	0.25
17	jog	rent	0	0	0	3.818	0	0.0918091	0.0993229	-0.02
18	dip	bossy	0	0	0	6	0	0.11765	0.0358764	0.05
19	tug	vote	0	0	0	2.953	4.732e-08	0.123706	0.0532191	-0.01
20	tank	water	0	0.055	0	2.753	1.80748e-05	0.629956	0.305408	0.35
21	royal	hotel	0	0	0	3.915	0	0.520168	0.122359	0.1
22	three	two	0.322	0.088	0.0103	0.678	0.336671	0.953471	0.929184	0.75
23	skunk	break	0	0	0	3.95	0	0.16555	0.0526054	0.01
24	gown	dress	0	0.353	0	2.885	5.93408e-07	0.772588	0.70213	0.59
25	essay	glue	0	0	0	2.792	4.44946e-06	0.197422	0.0332699	0.02
26	mild	track	0	0	0	4.33	0	0.21003	0.0542332	0.05
27	cabin	jelly	0	0	0	4.311	0	0.233553	-0.0123726	0.07
28	wood	fear	0	0	0	2.944	7.056e-08	0.243957	0.0422459	0.05
29	cent	art	0	0	0	6	0	0.289631	0.12044	0.05
30	shiny	layer	0	0	0	4.668	0	0.337929	0.180539	0.16
31	aroma	taste	0	0	0	2.789	5.45436e-05	0.741368	0.52055	0.51
32	task	alone	0	0	0	3.786	0	0.315006	0.113527	0.27
33	cream	shape	0	0	0	3.2	0	0.418278	0.157733	0.11
34	going	there	0	0	0	3.209	0	0.849302	0.51797	0.59
35	fairy	paper	0	0	0	3.893	0	0.399932	0.131773	0.07
36	honor	month	0	0	0	3.851	0	0.422792	0.0922279	0.18
37	snow	road	0	0	0	2.889	5.6475e-07	0.450625	0.225662	0.15
38	say	tell	0.167	0.041	0.0043	0.833	0.171771	0.854451	0.616353	0.59
39	will	have	0	0	0	2.894	2.39501e-06	0.851976	0.223448	0.67
40	waist	pants	0	0	0	1.902	0.000957	0.627422	0.482298	0.57
41	wrong	kill	0	0	0	2.644	0.000264727	0.588946	0.22318	0.2
42	mall	park	0	0	0	3.703	0	0.606091	0.391252	0.27
43	wine	beer	0.087	0.189	0.006	0.913	0.0932204	0.667456	0.621769	0.85
44	heavy	duty	0	0.035	0	1.932	0.00076016	0.74898	0.215163	0.29
45	blue	red	0.26	0.106	0.0146	0.74	0.287342	0.891267	0.722517	0.69
Word #	Target	ΔTarget	Target←ΔTarget AS	Target→ΔTarget AS	Target←ΔTarget MS	Target←ΔTarget Spath	Target←ΔTarget SpAct	Target/ΔTarget GloVe	Target/ΔTarget w2v	Target/ΔTarget LSA
1	doze	plus	0	0	0	5.732	0	-0.0474395	0.778065	0.04
2	bay	beach	0	0	0	3.761	0	0.710045	0.353887	0.44
3	aura	ski	0	0	0	6	0	0.215978	0.463918	0.11
4	prism	hurry	0	0	0	3.888	0	-0.0483825	0.151973	-0.02
5	slurp	west	0	0	0	4.758	0	-0.0968066	0.0591128	-0.01
6	toil	below	0	0	0	3.526	0	-0.0852609	0.388486	0.1
7	yearn	cards	0	0	0	3.755	0	-0.0898165	0.546338	0.02
8	court	jail	0	0.021	0	4.819	0	0.521345	0.257108	0.3
9	mend	hot	0	0	0.013	0.614	0.421875	-0.105553	0.361528	0.1
10	sap	laugh	0	0	0	4.748	0	-0.138907	0.443481	0.03
11	yolk	money	0	0	0	3.938	0	0.0665224	0.638801	0.01
12	pork	beef	0.018	0.042	0	3.924	0	0.778139	0.443106	0.68
13	graze	steel	0	0	0	4.81	0	-0.0248801	0.292852	0
14	fool	ugly	0	0	0	4.684	0	0.555311	0.403986	0.46
15	gin	sharp	0	0	0	2.946	6.3882e-08	0.138262	0.346132	0.03
16	notes	stair	0	0	0	3.599	0	0.0619572	0.357081	0.04
17	boy	girl	0.738	0.701	0	3.818	0	0.866382	0.280234	0.53
18	grand	city	0	0	0	6	0	0.559554	0.375102	0.34
19	large	small	0.176	0.606	0	2.953	4.732e-08	0.855927	0.378897	0.79
20	maple	smart	0	0	0	2.753	1.80748e-05	0.160892	0.562676	0.11
21	veal	car	0	0	0	3.915	0	0.0573694	0.483274	0.02
22	bun	lake	0	0	0.0103	0.678	0.336671	0.128479	0.601547	0.06
23	write	step	0	0	0	3.95	0	0.427614	0.336959	0.24
24	vine	navy	0	0	0	2.885	5.93408e-07	0.176583	0.446228	0.01
25	year	minor	0	0	0	2.792	4.44946e-06	0.360445	0.546736	0.14
26	scarf	silk	0	0	0	4.33	0	0.661047	0.426635	0.21
27	think	know	0.044	0.017	0	4.311	0	0.905683	0.209105	0.7
28	jock	tent	0	0	0	2.944	7.056e-08	0.296412	0.223575	0.24
29	brake	wheel	0	0	0	6	0	0.736977	0.604262	0.58
30	spin	enemy	0	0	0	4.668	0	0.277852	0.164454	0.1
31	magic	sky	0	0	0	2.789	5.45436e-05	0.47959	0.277864	0.26
32	tile	sand	0	0	0	3.786	0	0.444165	0.582821	0.19
33	force	happy	0	0	0	3.2	0	0.307827	0.608264	0.02
34	pipe	trade	0	0	0	3.209	0	0.364467	0.688381	-0.01
35	agony	hound	0	0	0	3.893	0	0.300787	0.480011	0.27
36	fur	coat	0.027	0.324	0	3.851	0	0.671295	0.563876	0.37
37	dough	bread	0.058	0.31	0	2.889	5.6475e-07	0.638597	0.373996	0.59
38	habit	corn	0	0	0.0043	0.833	0.171771	0.300734	0.431481	0.06
39	vent	hose	0	0	0	2.894	2.39501e-06	0.540203	0.469332	0.49
40	vodka	juice	0	0	0	1.902	0.000957	0.555065	0.504861	0.18
41	store	shop	0.391	0.177	0	2.644	0.000264727	0.808125	0.662127	0.52
42	how	what	0.051	0.047	0	3.703	0	0.871749	0.515705	0.82
43	many	all	0.122	0	0.006	0.913	0.0932204	0.760659	0.731907	0.68
44	song	music	0.074	0.209	0	1.932	0.00076016	0.761103	0.507347	0.79
45	learn	find	0	0	0.0146	0.74	0.287342	0.653854	0.278957	0.38
