# Supplementary material for: Semantic relatedness retroactively boosts memory and promotes memory interdependence across episodes
Source: eLife. 2022 Jun 15;11:e72519. doi: 10.7554/eLife.72519 (PMC9203053; doi:10.7554/eLife.72519)
Supplement: Supplementary file 3. — Results shown for every experiment and condition with mean and SEM for base (top) and secondary pair (bottom) memory. Related to Figure 2 and Figure 2—figure supplement 1. [file elife-72519-supp3.xlsx]

## Sheet: S3overallMem
Base pair testing			No Δ		ΔTarget		ΔCue		ΔBoth		Control
Learning conditions	Stimulus set	Test delay	Mean	SEM	Mean	SEM	Mean	SEM	Mean	SEM	Mean	SEM
Retrieval-to-criterion	1	5 min	0.95	0.00680983	0.886667	0.0103587	0.928333	0.00954637	0.858889	0.0109341	0.846667	0.0117505
Retrieval-to-criterion	1	48 hr	0.718889	0.0139995	0.622222	0.0160649	0.673889	0.0151523	0.559444	0.016734	0.392778	0.0157702
Retrieval-to-criterion	2	5 min	0.93	0.00752645	0.731111	0.0159944	0.816111	0.0125431	0.791111	0.0139028	0.805	0.0143623
Retrieval-to-criterion	2	48 hr	0.775556	0.0148395	0.547222	0.0165581	0.595	0.0159077	0.455	0.0165518	0.483889	0.0165948
Study-only	1	48 hr	0.483889	0.0205226	0.485	0.0207971	0.466667	0.0213101	0.416667	0.0211017	0.317222	0.0208748
Secondary pair testing			No Δ		ΔTarget		ΔCue		ΔBoth
Learning conditions	Stimulus set	Test delay	Mean	SEM	Mean	SEM	Mean	SEM	Mean	SEM
Retrieval-to-criterion	1	5 min	0.950556	0.007418	0.900556	0.0111778	0.918889	0.0102002	0.874444	0.0121591
Retrieval-to-criterion	1	48 hr	0.696111	0.0148085	0.505	0.0171084	0.623333	0.0159251	0.395556	0.0169049
Retrieval-to-criterion	2	5 min	0.919444	0.0086976	0.858889	0.0117015	0.839444	0.012321	0.874444	0.0129018
Retrieval-to-criterion	2	48 hr	0.776111	0.0143186	0.469444	0.0161695	0.365556	0.0163821	0.384444	0.0170183
Study-only	1	48 hr	0.440556	0.0212574	0.297222	0.0200647	0.392778	0.021381	0.231667	0.0181292
