# Supplementary material for: Semantic relatedness retroactively boosts memory and promotes memory interdependence across episodes
Source: eLife. 2022 Jun 15;11:e72519. doi: 10.7554/eLife.72519 (PMC9203053; doi:10.7554/eLife.72519)
Supplement: Supplementary file 4. — AS: associative strength; MS: mediator strength; Spath: weighted shortest path; SpAct: spreading activation strength; GloVe: global vector cos(θ); w2v: word2vec cos(θ); LSA: latent semantic analysis cos(θ). Bold: significant relationships (P<0.05). These values are specific to this data set and will vary across data sets or for a full dictionary. Note that the perfect correlation between AS and Spath reflects the fact that Spath is simply (1 – ←AS) with all one-step associations. Related to Results section. [file elife-72519-supp4.xlsx]

## Sheet: S4rfactors1
Factor	← AS	→ AS	← MS	← Spath	← SpAct	GloVe	w2v	LSA
← AS		0.225145	0.0526701	-1	0.981097	0.476206	0.461701	0.458644
→ AS			-0.2637	-0.225145	0.15709	0.329391	0.225058	0.10429
← MS				-0.0526701	0.146817	-0.139054	-0.0245215	0.183575
← Spath					-0.981097	-0.476206	-0.461701	-0.458644
← SpAct						0.413906	0.408713	0.46176
GloVe							0.832067	0.412892
w2v								0.351041
LSA
