# Supplementary material for: Semantic relatedness retroactively boosts memory and promotes memory interdependence across episodes
Source: eLife. 2022 Jun 15;11:e72519. doi: 10.7554/eLife.72519 (PMC9203053; doi:10.7554/eLife.72519)
Supplement: Supplementary file 5. — AS: associative strength; MS: mediator strength; Spath: weighted shortest path; SpAct: spreading activation strength; GloVe: global vector cos(θ); w2v: word2vec cos(θ); LSA: latent semantic analysis cos(θ). Bold: significant relationships (P<0.05). These values are specific to this data set and will vary across data sets or for a full dictionary. Related to Results section. [file elife-72519-supp5.xlsx]

## Sheet: S5rfactors2
Factor	← AS	→ AS	← MS	← Spath	← SpAct	GloVe	w2v	LSA
← AS		0.648346	0.461147	-0.551855	0.998481	0.436092	0.305464	0.433539
→ AS			0.414982	-0.496875	0.648303	0.424099	0.215575	0.483263
← MS				-0.55978	0.506687	0.456536	0.376261	0.605669
← Spath					-0.569287	-0.751775	-0.431353	-0.74265
← SpAct						0.450119	0.320388	0.454626
GloVe							0.452209	0.860405
w2v								0.491232
LSA
