# Supplementary material for: Semantic relatedness retroactively boosts memory and promotes memory interdependence across episodes
Source: eLife. 2022 Jun 15;11:e72519. doi: 10.7554/eLife.72519 (PMC9203053; doi:10.7554/eLife.72519)
Supplement: Supplementary file 6. — For the ΔBoth condition, we used the added cue +target relatedness featured in Figure 5—figure supplement 1. Relationships within each column align with the corresponding measures for that condition (e.g., ← AS indicates target←Δtarget AS in the ΔTarget condition). AS: associative strength; MS: mediator strength; Spath: weighted shortest path; SpAct: spreading activation strength; GloVe: global vector cos(θ); w2v: word2vec cos(θ); LSA: latent semantic analysis cos(θ). Bold: significant relationships (P<0.05). Related to Results section. [file elife-72519-supp6.xlsx]

## Sheet: S6MemDepCorr
Memorability and dependence correlations with relatedness					← AS		→ AS		← MS		← Spath		← SpAct		GloVe		w2v		LSA
Measure	Condition	Learning conditions	Stim set	Test delay	r2	p	r2	p	r2	p	r2	p	r2	p	r2	p	r2	p	r2	p
Memorability	ΔTarget	Retrieval-to-criterion	Narrower	5 min	0.0208034	0.749455	0.0223408	0.845393	0.0245634	0.153788	0.0208034	0.749455	0.0232532	0.991725	0.0215933	0.792637	0.0134033	0.521346	0.0174682	0.188897
		Retrieval-to-criterion	Narrower	48 hr	0.108434	0.0155219	0.239265	0.000384908	0.0107168	0.469116	0.108434	0.0155219	0.078481	0.0348721	0.150045	0.00497552	0.185673	0.00183359	0.023097	0.935273
		Retrieval-to-criterion	Wider	5 min	0.0404397	0.0983671	0.0204707	0.173053	0.0357652	0.112037	0.072077	0.0414623	0.0462284	0.0838301	0.221979	0.000642514	0.0119945	0.492822	0.10957	0.0150515
		Retrieval-to-criterion	Wider	48 hr	0.0775477	0.0357625	0.0591513	0.0588697	0.102771	0.0180937	0.0562501	0.0637104	0.0870883	0.0276402	0.190148	0.00161425	0.0110294	0.474743	0.185755	0.00182932
		Study-only	Narrower	48 hr	0.0965346	0.0214167	0.103252	0.0178599	0.0206311	0.7411	0.0965346	0.0214167	0.0686845	0.0454496	0.173625	0.00257767	0.151473	0.00478274	0.000492337	0.32814
	ΔCue	Retrieval-to-criterion	Narrower	5 min	0.0458251	0.0847659	0.0209778	0.758249	0.0625014	0.0537456	0.0458251	0.0847659	0.071383	0.0422481	0.00778943	0.252479	0.00185643	0.304101	0.022179	0.83246
		Retrieval-to-criterion	Narrower	48 hr	0.00429381	0.281456	0.0147083	0.550439	0.0223192	0.16404	0.00429381	0.281456	0.0077209	0.42003	0.0232498	0.98739	0.0198448	0.70638	0.0225087	0.860145
		Retrieval-to-criterion	Wider	5 min	0.0820626	0.0316571	0.0143731	0.206968	0.064649	0.0507025	0.0294803	0.133694	0.0850194	0.029228	0.0612643	0.0555826	0.0941994	0.0228114	0.0527943	0.0700142
		Retrieval-to-criterion	Wider	48 hr	0.0501259	0.07532	0.102783	0.0180879	0.0342988	0.116731	0.0487669	0.0781806	0.0491947	0.077268	0.00137719	0.308819	0.0501375	0.0752961	0.0307282	0.12906
		Study-only	Narrower	48 hr	0.0223413	0.845433	0.0426619	0.0924965	0.0186689	0.662122	0.0223413	0.845433	0.0231295	0.942256	0.0227164	0.880998	0.0210916	0.764188	0.0232535	0.992096
	ΔBoth	Retrieval-to-criterion	Narrower	5 min	0.0120645	0.221741	0.0112723	0.479192	0.0105841	0.466759	0.00711137	0.257807	0.0146059	0.205542	0.0232003	0.961715	0.0232526	0.990726	0.0205542	0.737468
		Retrieval-to-criterion	Narrower	48 hr	0.137049	0.0071171	0.0112689	0.479128	0.075513	0.0377839	0.0802909	0.0332084	0.134921	0.00754499	0.164349	0.00334326	0.185106	0.00186335	0.0095078	0.239555
		Retrieval-to-criterion	Wider	5 min	0.057172	0.0621293	0.0229691	0.913101	0.057172	0.0621293	0.0224209	0.852237	0.0534772	0.0687195	0.00356865	0.36351	0.00595633	0.394599	0.0150631	0.558864
		Retrieval-to-criterion	Wider	48 hr	0.00263046	0.352209	0.0167717	0.603204	0.00263046	0.352209	0.0211935	0.769655	0.000458939	0.318121	0.0131773	0.516583	0.00530747	0.272655	0.0157811	0.576688
		Study-only	Narrower	48 hr	0.0189261	0.671179	0.0168168	0.604472	0.0213871	0.78045	0.00908421	0.441351	0.0215484	0.789916	0.0137356	0.528489	0.002092	0.301815	0.0102498	0.460904
Memory dependence	ΔTarget	Retrieval-to-criterion	Narrower	5 min	0.0402786	0.0988077	0.0121088	0.221446	0.00658793	0.403441	0.0402786	0.0988077	0.0257802	0.148526	0.0521369	0.0712843	0.0648551	0.0504198	0.00124548	0.310131
		Retrieval-to-criterion	Narrower	48 hr	0.163765	0.00339822	0.0841615	0.0299129	0.0232171	0.968027	0.163765	0.00339822	0.149861	0.00500078	0.286947	8.899e-05	0.308737	4.43132e-05	0.0271093	0.143002
		Retrieval-to-criterion	Wider	5 min	0.213413	0.000825547	0.213745	0.000817597	0.165807	0.00320973	0.294399	7.02583e-05	0.23083	0.000494816	0.441987	3.81153e-07	0.0232267	0.972281	0.414773	1.09055e-06
		Retrieval-to-criterion	Wider	48 hr	0.254423	0.000243701	0.339748	1.58743e-05	0.143732	0.00592261	0.297611	6.34122e-05	0.26869	0.000157382	0.405872	1.52278e-06	0.0231837	0.956353	0.416967	1.00368e-06
		Study-only	Narrower	48 hr	0.0213402	0.777783	0.0199869	0.175502	0.0228048	0.891126	0.0213402	0.777783	0.0212101	0.770558	0.00317066	0.29162	0.0349619	0.114583	0.0154569	0.568508
	ΔCue	Retrieval-to-criterion	Narrower	5 min	0.115673	0.0127547	0.0362519	0.110524	0.022236	0.836897	0.115673	0.0127547	0.108658	0.0154281	0.0228137	0.892195	0.00929412	0.444777	0.00940258	0.446563
		Retrieval-to-criterion	Narrower	48 hr	0.0102647	0.234112	0.00745588	0.255084	0.234053	0.000449645	0.0102647	0.234112	0.00370794	0.36523	0.0156809	0.574136	0.03162	0.125855	0.010937	0.473069
		Retrieval-to-criterion	Wider	5 min	0.114784	0.0130664	0.176995	0.00234421	0.128895	0.00889749	0.0311716	0.127456	0.113573	0.0135031	0.0141047	0.53663	0.0719003	0.041661	0.00676212	0.40593
		Retrieval-to-criterion	Wider	48 hr	0.320024	3.06458e-05	0.288091	8.58321e-05	0.343827	1.38249e-05	0.202629	0.00112852	0.315977	3.49992e-05	0.287431	8.76404e-05	0.555011	2.65646e-09	0.413699	1.13567e-06
		Study-only	Narrower	48 hr	0.0136453	0.526532	0.0229458	0.90964	0.00811605	0.24996	0.0136453	0.526532	0.0148283	0.553261	0.0232528	0.991133	0.0226405	0.87296	0.0154607	0.568601
	ΔBoth	Retrieval-to-criterion	Narrower	5 min	0.0180118	0.185911	0.0180524	0.641577	0.00858512	0.246395	0.0399987	0.0995781	0.0177814	0.63301	0.00813201	0.426295	0.00217757	0.346921	0.0227205	0.881443
		Retrieval-to-criterion	Narrower	48 hr	0.0727532	0.0407109	0.0354193	0.113126	0.021417	0.78217	0.0363827	0.110122	0.0837325	0.0302614	0.00734336	0.255969	0.029027	0.135421	0.0147886	0.552326
		Retrieval-to-criterion	Wider	5 min	0.0219638	0.165731	0.0219638	0.165731	0.0219638	0.165731	0.0186602	0.661821	0.0216709	0.16714	0.0225853	0.867442	0.0424449	0.0930533	0.0250034	0.151862
		Retrieval-to-criterion	Wider	48 hr	0.0336198	0.118974	0.0141557	0.537772	0.0336198	0.118974	0.0167313	0.602075	0.0327678	0.121855	0.0232348	0.976441	0.00522713	0.27334	0.0285019	0.137453
		Study-only	Narrower	48 hr	0.00848809	0.247127	0.00666734	0.404573	0.0455734	0.0853556	0.0117724	0.488563	0.0318058	0.125198	0.0107621	0.469925	0.0922362	0.0240534	0.0219811	0.817957
