# Supplementary material for: Semantic relatedness retroactively boosts memory and promotes memory interdependence across episodes
Source: eLife. 2022 Jun 15;11:e72519. doi: 10.7554/eLife.72519 (PMC9203053; doi:10.7554/eLife.72519)
Supplement: Supplementary file 7. — Bold: significant relationships (P<0.05). Related to Results section. [file elife-72519-supp7.xlsx]

## Sheet: S7CorrsDepMem
Base pair memorability vs. base pair-secondary pair dependence across pairs
Condition	Learning conditions	Stim set	Test delay	r	p
ΔTarget	Retrieval-to-criterion	Narrower	5 min	0.202595	0.181977
	Retrieval-to-criterion	Narrower	48 hr	0.14141	0.354143
	Retrieval-to-criterion	Wider	5 min	0.247138	0.101693
	Retrieval-to-criterion	Wider	48 hr	0.198183	0.191882
	Study-only	Narrower	48 hr	-0.0551255	0.719101
ΔCue	Retrieval-to-criterion	Narrower	5 min	-0.111666	0.465215
	Retrieval-to-criterion	Narrower	48 hr	0.365416	0.0135744
	Retrieval-to-criterion	Wider	5 min	0.600853	1.27674e-05
	Retrieval-to-criterion	Wider	48 hr	0.58772	2.18801e-05
	Study-only	Narrower	48 hr	-0.278557	0.0638972
ΔBoth	Retrieval-to-criterion	Narrower	5 min	0.101695	0.506228
	Retrieval-to-criterion	Narrower	48 hr	0.288948	0.0542212
	Retrieval-to-criterion	Wider	5 min	0.394232	0.00736981
	Retrieval-to-criterion	Wider	48 hr	-0.0459706	0.764283
	Study-only	Narrower	48 hr	-0.313995	0.035683
