# Supplementary material for: Semantic relatedness retroactively boosts memory and promotes memory interdependence across episodes
Source: eLife. 2022 Jun 15;11:e72519. doi: 10.7554/eLife.72519 (PMC9203053; doi:10.7554/eLife.72519)
Supplement: Supplementary file 8. — For the ΔBoth condition, we used the added cue +target relatedness featured in Figure 5—figure supplement 1. Relationships within each column align with the corresponding measures for that condition (e.g., ← AS indicates target←Δtarget AS in the ΔTarget condition). AS: associative strength; MS: mediator strength; Spath: weighted shortest path; SpAct: spreading activation strength; GloVe: global vector cos(θ); w2v: word2vec cos(θ); LSA: latent semantic analysis cos(θ). Bold: significant relationships (P<0.05). Related to Results section. [file elife-72519-supp8.xlsx]

## Sheet: S8PCorrsRelMemDep
Correlations between relatedness and memorability, controlling for dependence				← AS		→ AS		← MS		← Spath		← SpAct		GloVe		w2v		LSA
Condition	Learning conditions	Stim set	Test delay	r2	p	r2	p	r2	p	r2	p	r2	p	r2	p	r2	p	r2	p
ΔTarget	Retrieval-to-criterion	Narrower	5 min	0.333991	0.0267105	0.236763	0.121769	-0.028892	0.852312	-0.333991	0.0267105	0.318836	0.034907	0.0150396	0.92281	0.153589	0.319547	0.112166	0.468514
	Retrieval-to-criterion	Narrower	48 hr	0.161582	0.294701	0.162628	0.291544	-0.48738	0.000792442	-0.161582	0.294701	0.122955	0.426535	0.0872591	0.573282	0.242581	0.112608	0.107015	0.489308
	Retrieval-to-criterion	Wider	5 min	0.313812	0.0380432	0.41534	0.0050532	0.338042	0.0248136	-0.184941	0.229423	0.31135	0.0396622	0.025364	0.870181	0.24265	0.112502	0.0639135	0.680214
	Retrieval-to-criterion	Wider	48 hr	0.557128	8.56394e-05	0.525216	0.000251646	0.579655	3.73543e-05	-0.441528	0.00269716	0.553588	9.70391e-05	0.537308	0.0001694	0.739836	9.58603e-09	0.637291	3.29092e-06
	Study-only	Narrower	48 hr	0.0954523	0.537669	0.0325109	0.834058	-0.172053	0.264093	-0.0954523	0.537669	0.0902829	0.560014	0.000439714	0.99774	0.0220446	0.887053	0.087498	0.572229
ΔCue	Retrieval-to-criterion	Narrower	5 min	0.245541	0.108153	0.190521	0.215428	0.156422	0.310595	-0.245541	0.108153	0.220109	0.151093	0.268837	0.0776361	0.285641	0.0601689	0.181785	0.23761
	Retrieval-to-criterion	Narrower	48 hr	0.341157	0.0234331	0.173077	0.261219	0.037079	0.81114	-0.341157	0.0234331	0.335194	0.0261351	0.471744	0.00122649	0.4871	0.00079882	0.243248	0.111592
	Retrieval-to-criterion	Wider	5 min	0.427625	0.00378714	0.456538	0.00183977	0.367981	0.0139888	-0.491017	0.000713747	0.442809	0.00261231	0.545382	0.000128964	-0.0859972	0.578861	0.58711	2.79991e-05
	Retrieval-to-criterion	Wider	48 hr	0.438001	0.0029436	0.552752	9.99286e-05	0.260971	0.0870728	-0.509851	0.000407471	0.446412	0.00238595	0.526826	0.000238936	0.0694447	0.654208	0.540776	0.000150803
	Study-only	Narrower	48 hr	0.153555	0.319657	0.337581	0.0250236	-0.0365947	0.813562	-0.153555	0.319657	0.139928	0.364975	0.327764	0.0298599	0.404344	0.00648432	-0.0481795	0.75613
ΔBoth	Retrieval-to-criterion	Narrower	5 min	0.186117	0.226423	0.102319	0.508673	-0.216212	0.158646	-0.186117	0.226423	0.146641	0.342189	0.13356	0.387415	0.197341	0.199143	-0.0392988	0.800058
	Retrieval-to-criterion	Narrower	48 hr	0.218327	0.154515	0.0873056	0.573077	0.162985	0.290474	-0.218327	0.154515	0.222268	0.147024	0.00864812	0.955569	0.0766794	0.620798	0.0468944	0.762444
	Retrieval-to-criterion	Wider	5 min	0.166065	0.281327	0.272882	0.0731058	-0.122995	0.426383	-0.0157549	0.91915	0.148589	0.335742	-0.088208	0.569103	-0.263288	0.0842047	-0.107497	0.487342
	Retrieval-to-criterion	Wider	48 hr	-0.012488	0.935876	0.065755	0.671513	-0.145158	0.347144	0.150958	0.328006	-0.0221384	0.886575	-3.28463e-05	0.999831	-0.135479	0.380569	-0.130893	0.39705
	Study-only	Narrower	48 hr	0.207467	0.176594	-0.0100172	0.948544	0.00397938	0.979547	-0.207467	0.176594	0.248677	0.103582	0.14747	0.339435	0.353547	0.0185602	0.123846	0.423167
Correlations between relatedness and dependence, controlling for memorability
ΔTarget	Retrieval-to-criterion	Narrower	5 min	0.203412	0.185393	-0.00176053	0.990951	0.28924	0.0568719	-0.203412	0.185393	0.253158	0.0973081	-0.173609	0.259733	-0.18541	0.228224	0.00911715	0.953162
	Retrieval-to-criterion	Narrower	48 hr	0.142245	0.357011	0.0686141	0.658088	-0.163612	0.288595	-0.142245	0.357011	0.105737	0.49454	-0.014794	0.924067	-0.0939565	0.54409	0.011692	0.939956
	Retrieval-to-criterion	Wider	5 min	0.255252	0.0944773	0.0948618	0.5402	0.221243	0.148945	-0.180325	0.241462	0.260479	0.0876915	0.273708	0.0722066	0.285466	0.0603329	0.250997	0.100295
	Retrieval-to-criterion	Wider	48 hr	0.191494	0.213051	0.295566	0.0514285	0.150925	0.328113	-0.199006	0.195302	0.189646	0.217583	0.0561801	0.717192	0.183845	0.232245	0.135028	0.382173
	Study-only	Narrower	48 hr	-0.0247074	0.873514	0.255196	0.0945521	0.0582882	0.707044	0.0247074	0.873514	-0.00614216	0.968436	-0.0229007	0.882696	-0.0447193	0.773164	0.00636494	0.967292
ΔCue	Retrieval-to-criterion	Narrower	5 min	-0.0219569	0.887499	0.0518865	0.738007	0.233791	0.126661	0.0219569	0.887499	0.0235695	0.879295	-0.0104522	0.946313	-0.0687979	0.657229	0.220798	0.149785
	Retrieval-to-criterion	Narrower	48 hr	0.240671	0.115556	0.440726	0.00275159	-0.116511	0.45135	-0.240671	0.115556	0.194488	0.205848	0.270692	0.0755313	0.318556	0.0350761	-0.103043	0.505662
	Retrieval-to-criterion	Wider	5 min	-0.0563185	0.716524	-0.117668	0.446838	-0.0250884	0.87158	0.044509	0.774202	-0.0560197	0.717966	0.142982	0.354498	0.135246	0.381395	-0.0543154	0.726208
	Retrieval-to-criterion	Wider	48 hr	0.0111586	0.94269	-0.101966	0.510143	0.153388	0.320189	0.075135	0.62787	0.0211363	0.891678	0.123398	0.424859	-0.129012	0.403925	0.108824	0.481951
	Study-only	Narrower	48 hr	0.369147	0.0136654	0.43502	0.00316716	-0.0588353	0.704418	-0.369147	0.0136654	0.325398	0.0311347	0.509957	0.00040615	0.514283	0.000355415	0.130475	0.39857
ΔBoth	Retrieval-to-criterion	Narrower	5 min	0.169685	0.270823	-0.121099	0.433602	0.37502	0.0121321	-0.169685	0.270823	0.21721	0.156687	-0.0788728	0.610812	-0.0865168	0.576561	0.0118272	0.939262
	Retrieval-to-criterion	Narrower	48 hr	0.337198	0.0251996	0.0617906	0.690295	-0.25512	0.0946536	-0.337198	0.0251996	0.334165	0.0266267	0.421868	0.00434083	0.41123	0.00555212	0.15791	0.305957
	Retrieval-to-criterion	Wider	5 min	-0.0393689	0.799708	-0.0439172	0.777128	-0.0519804	0.73755	-0.0432088	0.780634	-0.0353144	0.819976	0.161965	0.293544	0.0932025	0.547341	0.0264523	0.864662
	Retrieval-to-criterion	Wider	48 hr	0.0570805	0.712851	-0.0500469	0.746984	-0.0554692	0.720624	0.112283	0.46805	0.0533276	0.730999	-0.0991421	0.521989	-0.21976	0.151758	-0.0790952	0.609803
	Study-only	Narrower	48 hr	0.128778	0.404788	0.0672689	0.664392	0.0705094	0.649247	-0.128778	0.404788	0.154686	0.316062	0.130485	0.398537	0.286854	0.0590416	0.0734845	0.635464
