# Supplementary material for: Semantic relatedness retroactively boosts memory and promotes memory interdependence across episodes
Source: eLife. 2022 Jun 15;11:e72519. doi: 10.7554/eLife.72519 (PMC9203053; doi:10.7554/eLife.72519)
Supplement: Supplementary file 9. — For partial correlations, we used backward AS for the narrower stimulus set and GloVe for the wider stimulus set. Bold: significant relationships (P<0.05). Related to Results section. [file elife-72519-supp9.xlsx]

## Sheet: S9PCorrsMemLearn
Base pair memorability vs secondary pair learning efficiency across pairs
Condition	Learning conditions	Stim set	Test delay	r	p
ΔTarget	Retrieval-to-criterion	Narrower	5 min	0.0195346	0.693942
	Retrieval-to-criterion	Narrower	48 hr	0.00417271	0.282531
	Retrieval-to-criterion	Wider	5 min	0.0313992	0.126641
	Retrieval-to-criterion	Wider	48 hr	0.0915037	0.024534
ΔCue	Retrieval-to-criterion	Narrower	5 min	0.0308619	0.128574
	Retrieval-to-criterion	Narrower	48 hr	0.00173994	0.305239
	Retrieval-to-criterion	Wider	5 min	0.0140465	0.535331
	Retrieval-to-criterion	Wider	48 hr	0.0229802	0.91478
ΔBoth	Retrieval-to-criterion	Narrower	5 min	0.0230481	0.925993
	Retrieval-to-criterion	Narrower	48 hr	0.00500506	0.275245
	Retrieval-to-criterion	Wider	5 min	0.0232558	0.999213
	Retrieval-to-criterion	Wider	48 hr	0.0195314	0.693819
Base pair memorability vs relatedness (controlling for secondary pair learning efficiency)
				r	p
ΔTarget	Retrieval-to-criterion	Narrower	5 min	-0.0294678	0.849402
	Retrieval-to-criterion	Narrower	48 hr	0.336598	0.0254767
	Retrieval-to-criterion	Wider	5 min	0.453142	0.00200913
	Retrieval-to-criterion	Wider	48 hr	0.362732	0.0155257
ΔCue	Retrieval-to-criterion	Narrower	5 min	0.185191	0.228783
	Retrieval-to-criterion	Narrower	48 hr	0.103082	0.505499
	Retrieval-to-criterion	Wider	5 min	0.276452	0.0692828
	Retrieval-to-criterion	Wider	48 hr	0.161654	0.294483
ΔBoth	Retrieval-to-criterion	Narrower	5 min	0.161045	0.296331
	Retrieval-to-criterion	Narrower	48 hr	0.312656	0.0387964
	Retrieval-to-criterion	Wider	5 min	0.144635	0.348902
	Retrieval-to-criterion	Wider	48 hr	-0.098346	0.525353
