# Supplementary material for: Semantic relatedness retroactively boosts memory and promotes memory interdependence across episodes
Source: eLife. 2022 Jun 15;11:e72519. doi: 10.7554/eLife.72519 (PMC9203053; doi:10.7554/eLife.72519)
Supplement: Supplementary file 10. — For partial correlations, we used backward AS for the narrower stimulus set and GloVe for the wider stimulus set. Bold: significant relationships (P<0.05). Related to Results section. [file elife-72519-supp10.xlsx]

## Sheet: S10PCorrsDepLearn
Base pair-secondary pair dependence vs secondary pair learning efficiency across pairs
Condition	Learning conditions	Stim set	Test delay	r	p
ΔTarget	Retrieval-to-criterion	Narrower	5 min	-0.451211	0.00186521
	Retrieval-to-criterion	Narrower	48 hr	-0.318545	0.0329546
	Retrieval-to-criterion	Wider	5 min	-0.60056	1.29254e-05
	Retrieval-to-criterion	Wider	48 hr	-0.42764	0.00338799
ΔCue	Retrieval-to-criterion	Narrower	5 min	-0.483892	0.000757928
	Retrieval-to-criterion	Narrower	48 hr	-0.154689	0.310294
	Retrieval-to-criterion	Wider	5 min	-0.682054	2.48046e-07
	Retrieval-to-criterion	Wider	48 hr	-0.420542	0.0040225
ΔBoth	Retrieval-to-criterion	Narrower	5 min	-0.563175	5.63645e-05
	Retrieval-to-criterion	Narrower	48 hr	-0.167728	0.270758
	Retrieval-to-criterion	Wider	5 min	-0.201896	0.183522
	Retrieval-to-criterion	Wider	48 hr	0.16179	0.288331
Base pair-secondary pair dependence vs relatedness (controlling for secondary pair learning efficiency)
				r	p
ΔTarget	Retrieval-to-criterion	Narrower	5 min	0.0940432	0.543717
	Retrieval-to-criterion	Narrower	48 hr	0.409185	0.00581602
	Retrieval-to-criterion	Wider	5 min	0.676077	4.74394e-07
	Retrieval-to-criterion	Wider	48 hr	0.564786	6.50279e-05
ΔCue	Retrieval-to-criterion	Narrower	5 min	0.221944	0.14763
	Retrieval-to-criterion	Narrower	48 hr	0.0347019	0.823048
	Retrieval-to-criterion	Wider	5 min	-0.267934	0.0786764
	Retrieval-to-criterion	Wider	48 hr	0.461167	0.0016293
ΔBoth	Retrieval-to-criterion	Narrower	5 min	-0.0157967	0.918937
	Retrieval-to-criterion	Narrower	48 hr	0.260714	0.0873965
	Retrieval-to-criterion	Wider	5 min	-0.00917232	0.952879
	Retrieval-to-criterion	Wider	48 hr	0.00739326	0.962011
